# Supplementary material for: REVIEW: Towards a systems approach for understanding honeybee decline: a stocktaking and synthesis of existing models
Source: PubMed Central journal article supplement (PMC3810709; doi:10.1111/1365-2664.12112), 2013-06-10
Supplement: JPE-50-868-s001.pdf [file JPE-50-868-s001.pdf]

Supporting Information: Becher et al: Modelling Honeybee colonies  
S1a: Colony and Varroa models

| Authors                                  | Year | reviewed | Comment                                                                                                                        | Full reference                                                                                                                                                                                                                                                         |
|------------------------------------------|------|----------|--------------------------------------------------------------------------------------------------------------------------------|------------------------------------------------------------------------------------------------------------------------------------------------------------------------------------------------------------------------------------------------------------------------|
| Al-Khafaji, K., S. Tuljapurkar, et al.   | 2009 |          | Focus on population dynamics of colonies; single colonies described using the logistic equation.                               | Al-Khafaji, K., S. Tuljapurkar, et al. (2009). Hierarchical demography: a general approach with an application to honey bees. <i>Ecology</i> 90(2): 556-566.                                                                                                           |
| Amdam, G. V. and S. C. Seehuus           | 2006 |          | No model.                                                                                                                      | Amdam, G. V. and S. C. Seehuus (2006). Order, disorder, death: Lessons from a superorganism. <i>Advances in Cancer Research</i> , Vol 95 G. F. VandeWoude and G. Klein. 95:00:00 31-60.                                                                                |
| Antolin, M. F.                           | 1999 |          | Different species: parasitoid wasps                                                                                            | Antolin, M. F. (1999). A genetic perspective on mating systems and sex ratios of parasitoid wasps. <i>Researches on Population Ecology</i> 41(1): 29-37.                                                                                                               |
| Beauchamp, G.                            | 1992 |          | Focus on optimal foraging, # brood and in-hive bees assumed to be constant, only 20 days at end of foraging season considered. | Beauchamp, G. (1992). EFFECTS OF ENERGY-REQUIREMENTS AND WORKER MORTALITY ON COLONY GROWTH AND FORAGING IN THE HONEY-BEE. <i>Behavioral Ecology and Sociobiology</i> 31(2): 123-132.                                                                                   |
| Becher, M. A., H. Hildenbrandt, et al.   | 2010 | yes      |                                                                                                                                | Becher, M. A., H. Hildenbrandt, et al. (2010). Brood temperature, task division and colony survival in honeybees: A model. <i>Ecological Modelling</i> 221(5): 769-776.                                                                                                |
| Boot, W. J., M. Vanbaalen, et al.        | 1995 | yes      |                                                                                                                                | Boot, W. J., M. Vanbaalen, et al. (1995). WHY DO VARROA MITES INVADE WORKER BROOD CELLS OF THE HONEY-BEE DESPITE LOWER REPRODUCTIVE SUCCESS. <i>Behavioral Ecology and Sociobiology</i> 36(4): 283-289.                                                                |
| Bowen-Walker, P. L. and A. Gunn          | 1998 |          | No model.                                                                                                                      | Bowen-Walker, P. L. and A. Gunn (1998). Inter-host transfer and survival of <i>Varroa jacobsoni</i> under simulated and natural winter conditions. <i>Journal of Apicultural Research</i> 37(3): 199-204.                                                              |
| Branco, M. R., N. A. C. Kidd, et al.     | 1999 |          | Field study and statistical model.                                                                                             | Branco, M. R., N. A. C. Kidd, et al. (1999). Development of <i>Varroa jacobsoni</i> in colonies of <i>Apis mellifera iberica</i> in a Mediterranean climate. <i>Apidologie</i> 30(6): 491-503.                                                                         |
| Brodsgaard, C. J., H. Hansen, et al.     | 2000 |          | No model.                                                                                                                      | Brodsgaard, C. J., H. Hansen, et al. (2000). Progress of <i>Paenibacillus</i> larvae infection in individually inoculated honey bee larvae reared singly in vitro, in micro colonies, or in full-size colonies. <i>Journal of Apicultural Research</i> 39(1-2): 19-27. |
| Bromenshenk, J. J., J. Dosekocil, et al. | 1991 |          | Only description of software, no model description included.                                                                   | Bromenshenk, J. J., J. Dosekocil, et al. (1991). PC BEEPOP, AN ECOTOXICOLOGICAL SIMULATION-MODEL FOR HONEY-BEE POPULATIONS. <i>Environmental Toxicology and Chemistry</i> 10(4): 547-558.                                                                              |

Supporting Information: Becher et al: Modelling Honeybee colonies  
S1a: Colony and Varroa models

| Authors                                | Year | reviewed | Comment                                          | Full reference                                                                                                                                                                                                                                                                                |
|----------------------------------------|------|----------|--------------------------------------------------|-----------------------------------------------------------------------------------------------------------------------------------------------------------------------------------------------------------------------------------------------------------------------------------------------|
| Brown, M. J. F. and P. Schmid-Hempel   | 2003 |          | Different subject.                               | Brown, M. J. F. and P. Schmid-Hempel (2003). The evolution of female multiple mating in social hymenoptera. <i>Evolution</i> 57(9): 2067-2081.                                                                                                                                                |
| Calatayud, F. and M. J. Verdu          | 1995 |          | Field study and statistical model.               | Calatayud, F. and M. J. Verdu (1995). NUMBER OF ADULT FEMALE MITES VARROA-JACOBSONI OUD ON HIVE DEBRIS FROM HONEY-BEE COLONIES ARTIFICIALLY INFESTED TO MONITOR MITE POPULATION INCREASE (MESOSTIGMATA, VARROIDAE). <i>Experimental &amp; Applied Acarology</i> 19(3): 181-188.               |
| Calis, J. N. M., W. J. Boot, et al.    | 1999 | yes      |                                                  | Calis, J. N. M., W. J. Boot, et al. (1999). Model evaluation of methods for Varroa jacobsoni mite control based on trapping in honey bee brood. <i>Apidologie</i> 30(2-3): 197-207.                                                                                                           |
| Calis, J. N. M., W. J. Boot, et al.    | 1999 |          | No model.                                        | Calis, J. N. M., W. J. Boot, et al. (1999). Effective biotechnical control of varroa: applying knowledge on brood cell invasion to trap honey bee parasites in drone brood. <i>Journal of Apicultural Research</i> 38(1-2): 49-61.                                                            |
| Calis, J. N. M., I. Fries, et al.      | 1999 | yes      |                                                  | Calis, J. N. M., I. Fries, et al. (1999). Population modelling of Varroa jacobsoni Oud. <i>Apidologie</i> 30(2-3): 111-124.                                                                                                                                                                   |
| Cook, D. W. M.                         | 2002 |          | Different species: Fungi                         | Cook, D. W. M. (2002). A laboratory simulation for vectoring of Trichosporon pullulans by conidia of Botrytis cinerea. <i>Phytopathology</i> 92(12): 1293-1299.                                                                                                                               |
| Davidson, G., K. Phelps, et al.        | 2003 |          | Different subject.                               | Davidson, G., K. Phelps, et al. (2003). Study of temperature-growth interactions of entomopathogenic fungi with potential for control of Varroa destructor (Acari : Mesostigmata) using a nonlinear model of poikilotherm development. <i>Journal of Applied Microbiology</i> 94(5): 816-825. |
| Degradihoffman, G., S. A. Roth, et al. | 1989 | yes      |                                                  | Degradihoffman, G., S. A. Roth, et al. (1989). BEEPOP - A HONEYBEE POPULATION-DYNAMICS SIMULATION-MODEL. <i>Ecological Modelling</i> 45(2): 133-150.                                                                                                                                          |
| DeGrandi-Hoffman, G. and R. Curry      | 2004 | yes      |                                                  | DeGrandi-Hoffman, G. and R. Curry (2004). A mathematical model of varroa mite (Varroa destructor Anderson and Trueman) and honeybee (Apis mellifera L.) population dynamics. <i>International Journal of Acarology</i> 30(3): 259-274.                                                        |
| Degradihoffman, G. and R. Curry        | 2005 | (yes)    | based on DeGrandi-Hoffman and Curry 2004         | Degradihoffman, G. and R. Curry (2005). Simulated population dynamics of Varroa Mites in honey bee colonies: Part II - What the VARROAPOP model reveals. <i>American Bee Journal</i> 145(8): 629-632.                                                                                         |
| Deneubourg, J. L., A. Lioni, et al.    | 2002 |          | Different subject.                               | Deneubourg, J. L., A. Lioni, et al. (2002). Dynamics of aggregation and emergence of cooperation. <i>Biological Bulletin</i> 202(3): 262-267.                                                                                                                                                 |
| Fahrbach, S. E., S. M. Farris, et al.  | 2003 |          | Different subject.                               | Fahrbach, S. E., S. M. Farris, et al. (2003). Limits on volume changes in the mushroom bodies of the honey bee brain. <i>Journal of Neurobiology</i> 57(2): 141-151.                                                                                                                          |
| Fewell, J. H. and S. M. Bertram        | 1999 |          | Field study to test models on division of labour | Fewell, J. H. and S. M. Bertram (1999). Division of labor in a dynamic environment: response by honeybees (Apis mellifera) to graded changes in colony pollen stores. <i>Behavioral Ecology and Sociobiology</i> 46(3): 171-179.                                                              |
| Frank, S. A.                           | 1997 |          | Different subject.                               | Frank, S. A. (1997). The design of adaptive systems: Optimal parameters for variation and selection in learning and development. <i>Journal of Theoretical Biology</i> 184(1): 31-39.                                                                                                         |

Supporting Information: Becher et al: Modelling Honeybee colonies  
S1a: Colony and Varroa models

| Authors                                 | Year | reviewed | Comment                                                                                           | Full reference                                                                                                                                                                                                                                                             |
|-----------------------------------------|------|----------|---------------------------------------------------------------------------------------------------|----------------------------------------------------------------------------------------------------------------------------------------------------------------------------------------------------------------------------------------------------------------------------|
| Fries, I., S. Camazine, et al.          | 1994 | yes      |                                                                                                   | Fries, I., S. Camazine, et al. (1994). POPULATION-DYNAMICS OF VARROA-JACOBSONI - A MODEL AND A REVIEW. <i>Bee World</i> 75(1): 5-28.                                                                                                                                       |
| Fries, I. and S. Perez-Escala           | 2001 |          | No model.                                                                                         | Fries, I. and S. Perez-Escala (2001). Mortality of Varroa destructor in honey bee ( <i>Apis mellifera</i> ) colonies during winter. <i>Apidologie</i> 32(3): 223-229.                                                                                                      |
| Hayter, K. E. and J. E. Cresswell       | 2006 |          | Field study on pollination                                                                        | Hayter, K. E. and J. E. Cresswell (2006). The influence of pollinator abundance on the dynamics and efficiency of pollination in agricultural <i>Brassica napus</i> : implications for landscape-scale gene dispersal. <i>Journal of Applied Ecology</i> 43(6): 1196-1202. |
| Jarne, P. and P. J. L. Lagoda           | 1996 |          | Different subject.                                                                                | Jarne, P. and P. J. L. Lagoda (1996). Microsatellites, from molecules to populations and back. <i>Trends in Ecology &amp; Evolution</i> 11(10): 424-429.                                                                                                                   |
| Johnson, B. R.                          | 2009 |          | Different subject: Pattern formation on combs                                                     | Johnson, B. R. (2009). Pattern formation on the combs of honeybees: increasing fitness by coupling self-organization with templates. <i>Proceedings of the Royal Society B-Biological Sciences</i> 276(1655): 255-261.                                                     |
| Johnson, B. R.                          | 2010 |          | Different subject: division of Labour                                                             | Johnson, B. R. (2010). Division of labor in honeybees: form, function, and proximate mechanisms. <i>Behavioral Ecology and Sociobiology</i> 64(3): 305-316.                                                                                                                |
| Karsai, I. and T. Schmickl              | 2011 |          | Different subject: comb construction in wasps                                                     | Karsai, I. and T. Schmickl (2011). Regulation of task partitioning by a common stomach": a model of nest construction in social wasps." <i>Behavioral Ecology</i> 22(4): 819-830.                                                                                          |
| Kasper, M. L., A. F. Reeson, et al.     | 2008 |          | Different species: <i>Vespa</i>                                                                   | Kasper, M. L., A. F. Reeson, et al. (2008). Environmental factors influencing daily foraging activity of <i>Vespula germanica</i> (Hymenoptera, Vespidae) in Mediterranean Australia. <i>Insectes Sociaux</i> 55(3): 288-295.                                              |
| Khoury, D. S., M. R. Myerscough, et al. | 2011 | yes      |                                                                                                   | Khoury, D. S., M. R. Myerscough, et al. (2011). A Quantitative Model of Honey Bee Colony Population Dynamics. <i>Plos One</i> 6(4).                                                                                                                                        |
| Kleineidam, C. and F. Roces             | 2000 |          | No model, different species.                                                                      | Kleineidam, C. and F. Roces (2000). Carbon dioxide concentrations and nest ventilation in nests of the leaf-cutting ant <i>Atta vollenweideri</i> . <i>Insectes Sociaux</i> 47(3): 241-248.                                                                                |
| Kudo, K., S. Koji, et al.               | 2011 |          | Different species: neotropical wasps                                                              | Kudo, K., S. Koji, et al. (2011). Worker demography in a large-colony, swarm-founding wasp. <i>Population Ecology</i> 53(2): 297-306.                                                                                                                                      |
| Maggi, M., N. Damiani, et al.           | 2010 |          | Field study and statistical model.                                                                | Maggi, M., N. Damiani, et al. (2010). Brood cell size of <i>Apis mellifera</i> modifies the reproductive behavior of <i>Varroa destructor</i> . <i>Experimental and Applied Acarology</i> 50(3): 269-279.                                                                  |
| Makela, M. E., G. A. Rowell, et al.     | 1993 |          | Model description incomplete and unavailable; very little evidence of model testing and analysis. | Makela, M. E., G. A. Rowell, et al. (1993). AN OBJECT-ORIENTED INTRACOLONIAL AND POPULATION-LEVEL MODEL OF HONEY-BEES BASED ON BEHAVIORS OF EUROPEAN AND AFRICANIZED SUBSPECIES. <i>Ecological Modelling</i> 67(2-4): 259-284.                                             |

Supporting Information: Becher et al: Modelling Honeybee colonies  
S1a: Colony and Varroa models

| Authors                                   | Year | reviewed | Comment                                                                       | Full reference                                                                                                                                                                                                                               |
|-------------------------------------------|------|----------|-------------------------------------------------------------------------------|----------------------------------------------------------------------------------------------------------------------------------------------------------------------------------------------------------------------------------------------|
| Maleszka, J., A. B. Barron, et al.        | 2009 |          | Different subject.                                                            | Maleszka, J., A. B. Barron, et al. (2009). Effect of age, behaviour and social environment on honey bee brain plasticity. <i>Journal of Comparative Physiology a-Neuroethology Sensory Neural and Behavioral Physiology</i> 195(8): 733-740. |
| Martin, S.                                | 1998 | yes      |                                                                               | Martin, S. (1998). A population model for the ectoparasitic mite <i>Varroa jacobsoni</i> in honey bee ( <i>Apis mellifera</i> ) colonies. <i>Ecological Modelling</i> 109(3): 267-281.                                                       |
| Martin, S., T. Wossler, et al.            | 2002 |          | Different species.                                                            | Martin, S., T. Wossler, et al. (2002). Usurpation of African <i>Apis mellifera scutellata</i> colonies by parasitic <i>Apis mellifera capensis</i> workers. <i>Apidologie</i> 33(2): 215-231.                                                |
| Martin, S. J.                             | 2001 | yes      |                                                                               | Martin, S. J. (2001). The role of <i>Varroa</i> and viral pathogens in the collapse of honeybee colonies: a modelling approach. <i>Journal of Applied Ecology</i> 38(5): 1082-1093.                                                          |
| Matis, J. H. and T. R. Kiffe              | 2002 |          | Different subspecies (African honeybee), focus on mathematical representation | Matis, J. H. and T. R. Kiffe (2002). On interacting bee/mite populations: a stochastic model with analysis using cumulant truncation. <i>Environmental and Ecological Statistics</i> 9(3): 237-258.                                          |
| Matis, J. H., Q. Zheng, et al.            | 1995 |          | Different subspecies (African honeybee), focus on mathematical representation | Matis, J. H., Q. Zheng, et al. (1995). DESCRIBING THE SPREAD OF BIOLOGICAL POPULATIONS USING STOCHASTIC COMPARTMENTAL-MODELS WITH BIRTHS. <i>Mathematical Biosciences</i> 126(2): 215-247.                                                   |
| Meikle, W. G., J. M. Patt, et al.         | 2012 |          | Field study on small hive beetle                                              | Meikle, W. G., J. M. Patt, et al. (2012). Intraspecific Competition Effects on <i>Aethina tumida</i> (Coleoptera: Nitidulidae). <i>Journal of Economic Entomology</i> 105(1): 26-33.                                                         |
| Meikle, W. G., B. G. Rector, et al.       | 2008 |          | no model                                                                      | Meikle, W. G., B. G. Rector, et al. (2008). Within-day variation in continuous hive weight data as a measure of honey bee colony activity. <i>Apidologie</i> 39(6): 694-707.                                                                 |
| Mistro, D. C., L. A. D. Rodrigues, et al. | 2005 |          | Different species.                                                            | Mistro, D. C., L. A. D. Rodrigues, et al. (2005). The Africanized honey bee dispersal: a mathematical zoom. <i>Bulletin of Mathematical Biology</i> 67(2): 281-312.                                                                          |
| Mondragon, L., M. Spivak, et al.          | 2005 |          | Statistical model                                                             | Mondragon, L., M. Spivak, et al. (2005). A multifactorial study of the resistance of honeybees <i>Apis mellifera</i> to the mite <i>Varroa destructor</i> over one year in Mexico. <i>Apidologie</i> 36(3): 345-358.                         |
| Moretto, G.                               | 2002 |          | No model.                                                                     | Moretto, G. (2002). Mortality of <i>Varroa destructor</i> in broodless africanized and carnica honey bee ( <i>Apis mellifera</i> L.) colonies. <i>Interciencia</i> 27(12): 702-704.                                                          |
| Moritz, R. F. A.                          | 2002 |          | Different subspecies (Cape honey bee).                                        | Moritz, R. F. A. (2002). Population dynamics of the Cape bee phenomenon: The impact of parasitic laying worker clones in apiaries and natural populations. <i>Apidologie</i> 33(2): 233-244.                                                 |
| Murilhas, A. M.                           | 2002 |          | No model.                                                                     | Murilhas, A. M. (2002). <i>Varroa destructor</i> infestation impact on <i>Apis mellifera carnica</i> capped worker brood production, bee population and honey storage in a Mediterranean climate. <i>Apidologie</i> 33(3): 271-281.          |

Supporting Information: Becher et al: Modelling Honeybee colonies  
S1a: Colony and Varroa models

| Authors                                  | Year | reviewed | Comment                                                              | Full reference                                                                                                                                                                                                                                                                                                              |
|------------------------------------------|------|----------|----------------------------------------------------------------------|-----------------------------------------------------------------------------------------------------------------------------------------------------------------------------------------------------------------------------------------------------------------------------------------------------------------------------|
| Naug, D. and S. Camazine                 | 2002 |          | Behavioural time scale                                               | Naug, D. and S. Camazine (2002). The role of colony organization on pathogen transmission in social insects. <i>Journal of Theoretical Biology</i> 215(4): 427-439.                                                                                                                                                         |
| O'Donnell, S. and S. J. Bulova           | 2007 |          | Different subject: division of Labour.                               | O'Donnell, S. and S. J. Bulova (2007). Worker connectivity: a simulation model of variation in worker communication and its effects on task performance. <i>Insectes Sociaux</i> 54(3): 211-218.                                                                                                                            |
| Ohtsuki, H. and K. Tsuji                 | 2009 |          | Different subject: Game model on evolution of worker policing        | Ohtsuki, H. and K. Tsuji (2009). Adaptive Reproduction Schedule as a Cause of Worker Policing in Social Hymenoptera: A Dynamic Game Analysis. <i>American Naturalist</i> 173(6): 747-758.                                                                                                                                   |
| Oliver, R.                               | 2007 |          | based on existing models, e.g. DeGrandi-Hoffmans Varroapop           | Oliver, R. (2007). Fighting varroa: The silver bullet, or brass knuckles? - Strategy and tactics - Third in a series on integrated pest management of varroa. <i>American Bee Journal</i> 147(2): 135-140.                                                                                                                  |
| Oliver, R.                               | 2011 |          | tool for beekeepers, no description of the actual model              | Oliver, R. (2011). SICK BEES PART 12 Varroa Management-Getting Down to the Brass Tacks. <i>American Bee Journal</i> 151(9): 859-866.                                                                                                                                                                                        |
| Planque, R., J. B. van den Berg, et al.  | 2010 |          | Different species (ants)                                             | Planque, R., J. B. van den Berg, et al. (2010). Recruitment Strategies and Colony Size in Ants. <i>Plos One</i> 5(8).                                                                                                                                                                                                       |
| Pratt, S. C.                             | 1999 |          | Different subject.                                                   | Pratt, S. C. (1999). Optimal timing of comb construction by honeybee ( <i>Apis mellifera</i> ) colonies: a dynamic programming model and experimental tests. <i>Behavioral Ecology and Sociobiology</i> 46(1): 30-42.                                                                                                       |
| Pratt, S. C., D. J. T. Sumpter, et al.   | 2005 |          | Different species: <i>Temnothorax</i> (ant)                          | Pratt, S. C., D. J. T. Sumpter, et al. (2005). An agent-based model of collective nest choice by the ant <i>Temnothorax albipennis</i> . <i>Animal Behaviour</i> 70:00:00 1023-1036.                                                                                                                                        |
| Quijano, N. and K. M. Passino            | 2010 |          | focus on "bio-inspired" algorithms for to solve engineering problems | Quijano, N. and K. M. Passino (2010). Honey bee social foraging algorithms for resource allocation: Theory and application. <i>Engineering Applications of Artificial Intelligence</i> 23(6): 845-861.                                                                                                                      |
| Reich, S. E., S. Fuchs, et al.           | 1998 |          | Different subject.                                                   | Reich, S. E., S. Fuchs, et al. (1998). Geometric approximation of the infestation of honey bee brood cells by <i>Varroa jacobsoni</i> and implications for the estimation of brood infestation, for population models and for the proportion of non-sibling matings. <i>Journal of Apicultural Research</i> 37(2): 115-123. |
| Rinderer, T. E., L. I. De Guzman, et al. | 2001 |          | Field study                                                          | Rinderer, T. E., L. I. De Guzman, et al. (2001). Multi-state field trials of ARS Russian honey bees - 1. Responses to <i>Varroa destructor</i> 1999, 2000. <i>American Bee Journal</i> 141(9): 658-661.                                                                                                                     |
| Roubik, D. W. and H. Wolda               | 2001 |          | No model.                                                            | Roubik, D. W. and H. Wolda (2001). Do competing honey bees matter? Dynamics and abundance of native bees before and after honey bee invasion. <i>Population Ecology</i> 43(1): 53-62.                                                                                                                                       |

Supporting Information: Becher et al: Modelling Honeybee colonies  
S1a: Colony and Varroa models

| Authors                                 | Year | reviewed | Comment                                | Full reference                                                                                                                                                                                                                                         |
|-----------------------------------------|------|----------|----------------------------------------|--------------------------------------------------------------------------------------------------------------------------------------------------------------------------------------------------------------------------------------------------------|
| Royce, L. A., B. A. Stringer, et al.    | 1993 |          | Experimental study                     | Royce, L. A., B. A. Stringer, et al. (1993). INFESTATION OF TRACHEAL MITES (ACARI, TARSONEMIDAE) IN FERAL AND MANAGED COLONIES OF HONEY-BEES (HYMENOPTERA, APIDAE). <i>Journal of Economic Entomology</i> 86(3): 712-714.                              |
| Ruiz-Gonzalez, M. X. and M. J. F. Brown | 2006 |          | Field study                            | Ruiz-Gonzalez, M. X. and M. J. F. Brown (2006). Honey bee and bumblebee trypanosomatids: specificity and potential for transmission. <i>Ecological Entomology</i> 31(6): 616-622.                                                                      |
| Schmickl, T. and K. Crailsheim          | 2007 | yes      |                                        | Schmickl, T. and K. Crailsheim (2007). HoPoMo: A model of honeybee intracolony population dynamics and resource management. <i>Ecological Modelling</i> 204(1-2): 219-245.                                                                             |
| Stalidzans, E., Z. Markovitch, et al.   | 2001 |          | Conference abstract                    | Stalidzans, E., Z. Markovitch, et al. (2001). Simulation of death dynamics of wintering generation of bees under different climatical conditions.                                                                                                      |
| Stokes, K. E., Y. M. Buckley, et al.    | 2006 |          | Different species: <i>Bombus</i>       | Stokes, K. E., Y. M. Buckley, et al. (2006). A modelling approach to estimate the effect of exotic pollinators on exotic weed population dynamics: bumblebees and broom in Australia. <i>Diversity and Distributions</i> 12(5): 593-600.               |
| Sumpter, D. J. T. and D. S. Broomhead   | 2001 |          | Different species: <i>A. cerana</i>    | Sumpter, D. J. T. and D. S. Broomhead (2001). Relating individual behaviour to population dynamics. <i>Proceedings of the Royal Society of London Series B-Biological Sciences</i> 268(1470): 925-932.                                                 |
| Sumpter, D. J. T. and S. J. Martin      | 2004 | yes      |                                        | Sumpter, D. J. T. and S. J. Martin (2004). The dynamics of virus epidemics in Varroa-infested honey bee colonies. <i>Journal of Animal Ecology</i> 73(1): 51-63.                                                                                       |
| Tarapore, D., D. Floreano, et al.       | 2010 |          | Different subject: division of Labour. | Tarapore, D., D. Floreano, et al. (2010). Task-dependent influence of genetic architecture and mating frequency on division of labour in social insect societies. <i>Behavioral Ecology and Sociobiology</i> 64(4): 675-684.                           |
| Thierry, B., G. Theraulaz, et al.       | 1995 |          | Different subject: joint memory        | Thierry, B., G. Theraulaz, et al. (1995). Joint memory. <i>Behavioural Processes</i> 35(1-3): 127-140.                                                                                                                                                 |
| Thompson, H. M.                         | 2003 |          | No model.                              | Thompson, H. M. (2003). Behavioural effects of pesticides in bees - Their potential for use in risk assessment. <i>Ecotoxicology</i> 12(1-4): 317-330.                                                                                                 |
| Thompson, H. M., S. Wilkins, et al.     | 2005 | yes      |                                        | Thompson, H. M., S. Wilkins, et al. (2005). The effects of four insect growth-regulating (IGR) insecticides on honeybee ( <i>Apis mellifera</i> L.) colony development, queen rearing and drone sperm production. <i>Ecotoxicology</i> 14(7): 757-769. |
| Thompson, H. M., S. Wilkins, et al.     | 2007 | yes      |                                        | Thompson, H. M., S. Wilkins, et al. (2007). Modelling long-term effects of IGRs on honey bee colonies. <i>Pest Management Science</i> 63(11): 1081-1084.                                                                                               |
| Vetharaniam, I.                         | 2012 | yes      |                                        | Vetharaniam, I. (2012). Predicting reproduction rate of varroa. <i>Ecological Modelling</i> 224(1): 11-17.                                                                                                                                             |
| Vetharaniam, I. and N. D. Barlow        | 2006 | yes      |                                        | Vetharaniam, I. and N. D. Barlow (2006). Modelling biocontrol of Varroa destructor using a benign haplotype as a competitive antagonist. <i>New Zealand Journal of Ecology</i> 30(1): 87-102.                                                          |

Supporting Information: Becher et al: Modelling Honeybee colonies  
S1a: Colony and Varroa models

| Authors                               | Year | reviewed | Comment                               | Full reference                                                                                                                                                                                                                                                                                      |
|---------------------------------------|------|----------|---------------------------------------|-----------------------------------------------------------------------------------------------------------------------------------------------------------------------------------------------------------------------------------------------------------------------------------------------------|
| Waters, J. S., C. T. Holbrook, et al. | 2010 |          | Different species: Pogonomyrmex (ant) | Waters, J. S., C. T. Holbrook, et al. (2010). Allometric Scaling of Metabolism, Growth, and Activity in Whole Colonies of the Seed-Harvester Ant Pogonomyrmex californicus. <i>American Naturalist</i> 176(4): 501-510.                                                                             |
| Wilkinson, D. and G. C. Smith         | 2002 | yes      |                                       | Wilkinson, D. and G. C. Smith (2002). A model of the mite parasite, Varroa destructor, on honeybees ( <i>Apis mellifera</i> ) to investigate parameters important to mite population growth. <i>Ecological Modelling</i> 148(3): 263-275.                                                           |
| Yanez, O., R. Jaffe, et al.           | 2012 |          | Field study                           | Yanez, O., R. Jaffe, et al. (2012). Deformed wing virus and drone mating flights in the honey bee ( <i>Apis mellifera</i> ): implications for sexual transmission of a major honey bee virus. <i>Apidologie</i> 43(1): 17-30.                                                                       |
| Zhao, X., V. Coptis, et al.           | 2008 |          | Different species: Tribolium (beetle) | Zhao, X., V. Coptis, et al. (2008). Metamorphosis and Adult Development of the Mushroom Bodies of the Red Flour Beetle, <i>Tribolium castaneum</i> . <i>Developmental Neurobiology</i> 68(13): 1487-1502.                                                                                           |
| Al Ghamdi and Hoopingarner            | 2004 | yes      | Additional                            | Al Ghamdi, A. & Hoopingarner R. (2004) Modeling of honey bee and varroa mite population dynamics. <i>Saudi Journal of biological sciences</i> . 11, 21-36.                                                                                                                                          |
| Omholt                                | 1986 | yes      | Additional                            | Omholt, S. (1986) A model for intracolony population dynamics of the honeybee in temperate zones. <i>Journal of Apicultural Research</i> , 25:9–21.                                                                                                                                                 |
| Omholt & Crailsheim                   | 1991 | yes      | Additional                            | Omholt, S.W. & Crailsheim, K. (1991) The possible prediction of the degree infestation of honeybee colonies ( <i>Apis mellifera</i> ) by <i>Varroa jacobsoni</i> OUD. by means of its natural death-rate: a dynamic model approach. <i>Norwegian Journal of Agricultural Sciences</i> . 5. 393-400. |

Supporting Information: Becher et al: Modelling Honeybee colonies  
S1b: Foraging models

| Authors                  | Year | reviewed | Comment                          | Full reference                                                                                                                                                                                                                                                       |
|--------------------------|------|----------|----------------------------------|----------------------------------------------------------------------------------------------------------------------------------------------------------------------------------------------------------------------------------------------------------------------|
| Burns and Thomson        | 2006 |          | Different species: bumble bees   | J. G. Burns and J. D. Thomson. A test of spatial memory and movement patterns of bumblebees at multiple spatial and temporal scales. <i>Behavioral Ecology</i> 17 (1):48-55, 2006.                                                                                   |
| Cresswell                | 1997 |          | Different species: bumble bees   | J. E. Cresswell. Spatial heterogeneity, pollinator behaviour and pollinator-mediated gene flow: Bumblebee movements in variously aggregated rows of oil-seed rape. <i>Oikos</i> 78 (3):546-556, 1997.                                                                |
| Cresswell et al.         | 1995 |          | Focus on pollen distribution     | J. E. Cresswell, A. P. Bassom, S. A. Bell, S. J. Collins, and T. B. Kelly. Predicted pollen dispersal by honey-bees and three species of bumble-bees foraging on oil-seed rape: A comparison of three models. <i>Functional Ecology</i> 9 (6):829-841, 1995.         |
| Cresswell et al.         | 2000 |          | Different species: bumble bees   | J. E. Cresswell, J. L. Osborne, and D. Goulson. An economic model of the limits to foraging range in central place foragers with numerical solutions for bumblebees. <i>Ecological Entomology</i> 25 (3):249-255, 2000.                                              |
| Diekotter et al.         | 2006 |          | Different species: bumble bees   | T. Diekotter, K. Walther-Hellwig, M. Conradi, M. Suter, and R. Frankl. Effects of landscape elements on the distribution of the rare bumblebee species <i>Bombus muscorum</i> in an agricultural landscape. <i>Biodiversity and Conservation</i> 15 (1):57-68, 2006. |
| Dreisig                  | 1997 |          | Different species: bumble bees   | H. Dreisig. Why do some nectar foragers perch and others hover while probing flowers? <i>Evolutionary Ecology</i> 11 (5):543-555, 1997.                                                                                                                              |
| Dukas and Edelman-Keshet | 1998 | yes      |                                  | R. Dukas and L. Edelman-Keshet. The spatial distribution of colonial food provisioners. <i>Journal of Theoretical Biology</i> 190 (2):121-134, 1998.                                                                                                                 |
| Higginson and Gilbert    | 2004 | yes      |                                  | A. D. Higginson and F. Gilbert. Paying for nectar with wingbeats: a new model of honeybee foraging. <i>Proceedings of the Royal Society of London Series B-Biological Sciences</i> 271 (1557):2595-2603, 2004.                                                       |
| Jordan and Harder        | 2006 |          | Focus on plant architecture      | C. Y. Jordan and L. D. Harder. Manipulation of bee behavior by inflorescence architecture and its consequences for plant mating. <i>American Naturalist</i> 167 (4):496-509, 2006.                                                                                   |
| Mitesser et al.          | 2006 |          | Different species: halictid bees | O. Mitesser, N. Weissel, E. Strohm, and H. J. Poethke. The evolution of activity breaks in the nest cycle of annual eusocial bees: a model of delayed exponential growth. <i>Bmc Evolutionary Biology</i> 6, 2006.                                                   |
| Ohashi and Thomson       | 2009 |          | Different species: bumble bees   | K. Ohashi and J. D. Thomson. Trapline foraging by pollinators: its ontogeny, economics and possible consequences for plants. <i>Annals of Botany</i> 103 (9):1365-1378, 2009.                                                                                        |
| Ohashi and Yahara        | 2002 |          | Different species: bumble bees   | K. Ohashi and T. Yahara. Visit larger displays but probe proportionally fewer flowers: counterintuitive behaviour of nectar-collecting bumble bees achieves an ideal free distribution. <i>Functional Ecology</i> 16 (4):492-503, 2002.                              |
| Osborne et al.           | 2008 |          | Different species: bumble bees   | J. L. Osborne, A. P. Martin, N. L. Carreck, J. L. Swain, M. E. Knight, D. Goulson, R. J. Hale, and R. A. Sanderson. Bumblebee flight distances in relation to the forage landscape. <i>Journal of Animal Ecology</i> 77 (2):406-415, 2008.                           |
| Petrikina and Wells      | 1995 |          | Experimental study               | J. Petrikina and H. Wells. Honey bee ( <i>Apis mellifera</i> ) use of flower pigment patterns in making foraging choices. <i>Journal of the Kansas Entomological Society</i> 68 (4):377-387, 1995.                                                                   |
| Pratt                    | 1999 |          | Focus on comb construction       | S. C. Pratt. Optimal timing of comb construction by honeybee ( <i>Apis mellifera</i> ) colonies: a dynamic programming model and experimental tests. <i>Behavioral Ecology and Sociobiology</i> 46 (1):30-42, 1999.                                                  |
| Raine et al.             | 2009 |          | Different species: bumble bees   | N. E. Raine, D. K. Rossmo, and S. C. Le Comber. Geographic profiling applied to testing models of bumble-bee foraging. <i>Journal of the Royal Society Interface</i> 6 (32):307-319, 2009.                                                                           |



Supporting Information: Becher et al: Modelling Honeybee colonies  
S1b: Foraging models

| Authors                 | Year       | reviewed | Comment                          | Full reference                                                                                                                                                                                                                                                |
|-------------------------|------------|----------|----------------------------------|---------------------------------------------------------------------------------------------------------------------------------------------------------------------------------------------------------------------------------------------------------------|
| Rands and Whitney       | 2008       |          | Different species: bumble bees   | S. A. Rands and H. M. Whitney. Floral Temperature and Optimal Foraging: Is Heat a Feasible Floral Reward for Pollinators? <i>Plos One</i> 3 (4), 2008.                                                                                                        |
| Real                    | 1991       |          | Different species: bumble bees   | L. A. Real. Animal Choice Behavior and the Evolution of Cognitive Architecture. <i>Science</i> 253 (5023):980-986, 1991.                                                                                                                                      |
| Roulston and Silverman  | 2002       |          | Different species: ants          | T. H. Roulston and J. Silverman. The effect of food size and dispersion pattern on retrieval rate by the Argentine ant, <i>Linepithema humile</i> (Hymenoptera : formicidae). <i>Journal of Insect Behavior</i> 15 (5):633-648, 2002.                         |
| Spaethe et al.          | 2001       |          | Different species: bumble bees   | J. Spaethe, J. Tautz, and L. Chittka. Visual constraints in foraging bumblebees: Flower size and color affect search time and flight behavior. <i>Proceedings of the National Academy of Sciences of the United States of America</i> 98 (7):3898-3903, 2001. |
| Stout and Goulson       | 2002       |          | Different species: bumble bees   | J. C. Stout and D. Goulson. The influence of nectar secretion rates on the responses of bumblebees ( <i>Bombus</i> spp.) to previously visited flowers. <i>Behavioral Ecology and Sociobiology</i> 52 (3):239-246, 2002.                                      |
| Strickler               | 1996       |          | Different species: solitary bees | K. Strickler. Seed and bee yields as a function of forager populations: Alfalfa pollination as a model system. <i>Journal of the Kansas Entomological Society</i> 69 (4):201-215, 1996.                                                                       |
| Suzuki et al.           | 2007       |          | Different species: bumble bees   | Y. Suzuki, L. G. Kawaguchi, and Y. Toquenaga. Estimating nest locations of bumblebee <i>Bombus ardens</i> from flower quality and distribution. <i>Ecological Research</i> 22 (2):220-227, 2007.                                                              |
| Taneyhill               | 2007       |          | Different species: bumble bees   | D. E. Taneyhill. Foraging mechanisms and the currency for models of energy maximization in bumble bees (Hymenoptera : Apidae : <i>Bombus occidentalis</i> ). <i>Entomologia Generalis</i> 30 (2):119-133, 2007.                                               |
| Williams and Thomson    | 1998       |          | Different species: bumble bees   | N. M. Williams and J. D. Thomson. Trapline foraging by bumble bees: III. Temporal patterns of visitation and foraging success at single plants. <i>Behavioral Ecology</i> 9 (6):612-621, 1998.                                                                |
| Schmid-Hempel et al.    | 1985       | yes      | Additional                       | Schmid-Hempel, P., Kacelnik, A. & Houston, A.I. (1985) Honeybees maximize efficiency by not filling their crop. <i>Behavioral Ecology and Sociobiology</i> , 17, 61–66.                                                                                       |
| Camazine and Sneyd      | 1991       | yes      | Additional                       | Camazine S, Sneyd J (1991) A Model of Collective Nectar Source Selection by Honey Bees: Self-organization Through Simple Rules. <i>Journal of Theoretical Biology</i> , 149, 547-571.                                                                         |
| de Vries and Biesmeijer | 1998, 2002 | yes      | Additional                       | De Vries, H. & Biesmeijer, J.C. (1998) Modelling collective foraging by means of individual behaviour rules in honeybees. <i>Behavioral Ecology and Sociobiology</i> , 44, 109-124.                                                                           |
| Sumpter and Pratt       | 2003       | yes      | Additional                       | Sumpter, D.J.T. & Pratt, S.C. (2003) A modelling framework for understanding social insect foraging. <i>Behavioral Ecology and Sociobiology</i> . 53, 131–144.                                                                                                |
| Schmickl and Crailsheim | 2004       | yes      | Additional                       | Schmickl, T. & Crailsheim, K. (2004) Costs of environmental fluctuations and benefits of dynamic decentralized foraging decisions in honey bees. <i>Adaptive Behavior</i> , 12, 263-277                                                                       |
| Dornhaus et al.         | 2006a      | yes      | Additional                       | Dornhaus, A., Klügl, F., Oechslein, C., Puppe, F. & Chittka, L. (2006) Benefits of recruitment in honey bees: effects of ecology and colony size in an individual-based model. <i>Behavioral Ecology</i> , 17, 336-344.                                       |

Supporting Information: Becher et al: Modelling Honeybee colonies  
S1b: Foraging models

| Authors          | Year  | reviewed | Comment    | Full reference                                                                                                                                                                                                                        |
|------------------|-------|----------|------------|---------------------------------------------------------------------------------------------------------------------------------------------------------------------------------------------------------------------------------------|
| Dornhaus et al.  | 2006b | yes      | Additional | Dornhaus, A., Collins, E.J., Dechaume-Moncharmont, F.-X., Houston, A.I., Franks, N.R. & McNamara, J.M. (2006) Paying for information: partial loads in central place foragers. <i>Behavioral Ecology and Sociobiology</i> 61,151–161. |
| Beekman et al.   | 2007  | yes      | Additional | Beekman, M., Gilchrist, A.L., Duncan, M., Sumpter, D.J.T. (2007) What makes a honeybee scout? <i>Behavioral Ecology and Sociobiology</i> , 61, 985-995.                                                                               |
| Johnson and Nieh | 2010  | yes      | Additional | Johnson, B.R. & Nieh, J.C. (2010) Modeling the adaptive role of negative signaling in honey bee intraspecific competition. <i>Journal of Insect Behavior</i> 23, 459-471.                                                             |
| Schmickl et al.  | 2012  | yes      | Additional | Schmickl, T., Thenius, R., Crailsheim, K. (2012) Swarm-intelligent foraging in honeybees: benefits and costs of task-partitioning and environmental fluctuations. <i>Neural Computing and Applications</i> , 21, 251-268.             |
