# Supplementary material for: REVIEW: Towards a systems approach for understanding honeybee decline: a stocktaking and synthesis of existing models
Source: PubMed Central journal article supplement (PMC3810709; doi:10.1111/1365-2664.12112), 2013-06-10
Supplement: JPE-50-868-s003.pdf [file JPE-50-868-s003.pdf]

Table S3. Entities and state variables of colony models. ‘Age’ refers to age cohorts, characterized by their age in days and number of individuals; N: number, i.e. abundance; Sex: distinction between worker and drone larvae.

| ENTITY               | MODEL | Omholt 1986    | deGrandi-Hoffman <i>et al.</i> 1989                 | Martin 2001                                         | AlGhamdi & Hoopingarner 2004 | Thompson <i>et al.</i> 2005/2007 | Schmickl & Crailsheim 2007                                    | Becher <i>et al.</i> 2010       | Khoury <i>et al.</i> 2011 |   |
|----------------------|-------|----------------|-----------------------------------------------------|-----------------------------------------------------|------------------------------|----------------------------------|---------------------------------------------------------------|---------------------------------|---------------------------|---|
| Winter bees          |       | N              |                                                     |                                                     |                              |                                  |                                                               | Age                             |                           |   |
| Queen                |       |                | Age, sperm                                          |                                                     | Age                          |                                  |                                                               |                                 |                           |   |
| Eggs                 |       | N <sup>1</sup> | Age                                                 | Age                                                 | Age, sex                     |                                  | Age                                                           |                                 |                           |   |
| Larvae (brood)       |       | N              | Age, sex                                            | Age, sex                                            | Age, sex                     |                                  | Age                                                           | Age                             |                           |   |
| Pupae (sealed brood) |       | N              |                                                     | Age, sex                                            |                              | Age, sex                         | N, sex                                                        |                                 | Age                       |   |
| Drones               |       | N              | Age                                                 | Age                                                 | Age                          |                                  |                                                               | Age                             |                           |   |
| In-hive bees         |       |                | Age                                                 | Age                                                 | Age                          | N <sup>4</sup>                   | N                                                             | N nurses<br>N nectar processors | Temperature at emergence  | N |
| Foragers             |       |                | Age                                                 |                                                     |                              | N                                |                                                               |                                 |                           |   |
| Comb                 |       |                |                                                     |                                                     |                              |                                  | N of empty and brood cells<br>Stores of nectar, pollen, honey | N of empty and brood cells      |                           |   |
| Environment          |       |                | Temperature<br>Photoperiod<br>Windspeed<br>Rainfall | Temperature<br>Photoperiod<br>Windspeed<br>Rainfall | Temperature<br>Photoperiod   |                                  | Season<br>Rain<br>Temperature                                 |                                 |                           |   |
| Invaded mites        |       |                |                                                     | N                                                   |                              |                                  |                                                               |                                 |                           |   |
| Phoretic mites       |       |                |                                                     | N                                                   | N                            |                                  |                                                               |                                 |                           |   |

<sup>1</sup> No equations provided

<sup>2</sup> Distinguished between workforce (available) and active (demand driven)
